# Supplementary material
Source: PubMed Central journal article supplement (PMC11584271)
Supplement: 10-1055-s-0042-1756307-sjpic-22-00028.pdf [file 10-1055-s-0042-1756307-sjpic-22-00028.pdf]

**Supplementary Table S1** Characteristics of patients with septic shock and respiratory failure—including those that died and did not complete baseline HRQL assessment

| Characteristics                              | No oxygenation defect ( <i>n</i> = 143) | Mild oxygenation severity ( <i>n</i> = 69) | Moderate oxygenation severity ( <i>n</i> = 69) | Severe oxygenation severity ( <i>n</i> = 67) |
|----------------------------------------------|-----------------------------------------|--------------------------------------------|------------------------------------------------|----------------------------------------------|
| Sex, <i>n</i> (%)                            |                                         |                                            |                                                |                                              |
| Male                                         | 75 (52)                                 | 36 (52)                                    | 42 (61)                                        | 36 (54)                                      |
| Female                                       | 68 (48)                                 | 33 (48)                                    | 27 (39)                                        | 31 (46)                                      |
| Age in years, median (IQR)                   | 6.4 (2.0–13.2)                          | 4.9 (1.5–12.3)                             | 3.5 (1.0–11.7)                                 | 7.1 (2.2–12.5)                               |
| Race/Ethnicity                               |                                         |                                            |                                                |                                              |
| American Indian/Alaskan Native               | 5 (4%)                                  | 2 (3%)                                     | 2 (3%)                                         | 1 (1%)                                       |
| Asian                                        | 8 (6%)                                  | 2 (3%)                                     | 6 (9%)                                         | 4 (6%)                                       |
| Black or African-American                    | 38 (27%)                                | 7 (10%)                                    | 15 (22%)                                       | 16 (24%)                                     |
| White                                        | 82 (57%)                                | 54 (78%)                                   | 42 (61%)                                       | 44 (66%)                                     |
| Native Hawaiian or Other Pacific Islander    | 2 (1%)                                  | 0 (0%)                                     | 1 (1%)                                         | 2 (3%)                                       |
| Unknown/Not reported                         | 12 (8%)                                 | 7 (10%)                                    | 6 (9%)                                         | 2 (3%)                                       |
| Baseline HRQL measure, median (IQR)          |                                         |                                            |                                                |                                              |
| PedsQL ( <i>n</i> = 202)                     | 78.5 (66.4–93.1)                        | 78.4 (62.9–90.7)                           | 81.0 (72.2–92.2)                               | 79.9 (69.7–96.9)                             |
| FS II-R ( <i>n</i> = 119)                    | 67.9 (60.7–82.1)                        | 64.3 (57.1–85.7)                           | 67.9 (57.1–78.6)                               | 75.0 (60.7–82.1)                             |
| Baseline FSS, median (IQR)                   | 7 (6–12)                                | 7 (6–11)                                   | 6 (6–9)                                        | 6 (6–13)                                     |
| Medical history, <i>n</i> (%)                |                                         |                                            |                                                |                                              |
| Immunocompromised                            | 25 (18)                                 | 7 (10)                                     | 9 (13)                                         | 12 (18)                                      |
| Congenital immunodeficiency                  | 4 (6)                                   | 1 (4)                                      | 0 (0)                                          | 1 (3)                                        |
| Bone marrow/SCT                              | 1 (2)                                   | 0 (0)                                      | 0 (0)                                          | 1 (3)                                        |
| Malignancy                                   | 4 (6)                                   | 1 (4)                                      | 2 (6)                                          | 7 (23)                                       |
| Rheumatologic disease                        | 2 (3)                                   | 1 (4)                                      | 0 (0)                                          | 1 (3)                                        |
| Sickle cell disease                          | 2 (3)                                   | 0 (0)                                      | 0 (0)                                          | 0 (0)                                        |
| Adjunct respiratory support                  |                                         |                                            |                                                |                                              |
| Neuromuscular blockade                       | 106 (74%)                               | 58 (84%)                                   | 58 (84%)                                       | 60 (90%)                                     |
| Days of neuromuscular blockade               | 1 (0–3)                                 | 2 (1–3)                                    | 3 (1–6)                                        | 5 (2–10)                                     |
| HFV                                          | 8 (6%)                                  | 2 (3%)                                     | 5 (7%)                                         | 16 (24%)                                     |
| ECLS                                         | 6 (4%)                                  | 3 (4%)                                     | 5 (7%)                                         | 13 (19%)                                     |
| Mechanical ventilation days, median (IQR)    | 6 (4–10)                                | 8 (5–12)                                   | 10 (7–16)                                      | 16 (10–28)                                   |
| PICU LOS (d), median (IQR)                   | 8 (5–13)                                | 9 (6–15)                                   | 11 (8–15)                                      | 17 (10–29)                                   |
| Hospital LOS (d), median (IQR)               | 15 (8–24)                               | 16 (10–23)                                 | 18 (11–32)                                     | 21 (13–44)                                   |
| Survived to PICU discharge, <i>n</i> (%)     | 134 (94)                                | 64 (93)                                    | 65 (94)                                        | 56 (84)                                      |
| Survived to hospital discharge, <i>n</i> (%) | 133 (93)                                | 63 (91)                                    | 62 (90)                                        | 56 (84)                                      |

Abbreviations: ECMO, extracorporeal membrane oxygenation; FS II-R, Functional Status II-Revised; FSS, Functional Status Scale; HFV, high frequency ventilation; HRQL, health-related quality of life; IQR, interquartile range; LOS, length of stay; PedsQL, Pediatric Quality of Life Inventory 4.0; PICU, pediatric intensive care unit.

**Supplementary Table S2** Logistic regression models for failure to return to baseline (within 4.5 points of baseline HRQL measure)

|                              | Follow-up time point |                     |                |                     |                 |                     |
|------------------------------|----------------------|---------------------|----------------|---------------------|-----------------|---------------------|
|                              | 3 mo (n = 178)       |                     | 6 mo (n = 154) |                     | 12 mo (n = 145) |                     |
| Oxygenation failure severity | Odds ratio           | Confidence interval | Odds ratio     | Confidence interval | Odds ratio      | Confidence interval |
| Absent                       | Ref                  | Ref                 | Ref            | Ref                 | Ref             | Ref                 |
| Mild                         | 0.44                 | 0.18–1.13           | 0.45           | 0.13–1.49           | 0.55            | 0.21–1.46           |
| Moderate                     | 0.60                 | 0.26–1.41           | 1.60           | 0.61–4.18           | 0.61            | 0.24–1.56           |
| Severe                       | 1.53                 | 0.66–3.59           | 1.06           | 0.41–2.76           | 0.53            | 0.19–1.45           |
| Age (y)                      | 1.04                 | 0.98–1.10           | 1.06           | 0.99–1.13           | 0.98            | 0.92–1.04           |
| Nonrespiratory PELOD-2       | 1.05                 | 0.91–1.20           | 0.98           | 0.84–1.15           | 1.05            | 0.90–1.23           |

Abbreviations: HRQL, health-related quality of life; PELOD-2, Pediatric Logistic Organ Dysfunction-2 score.

**Supplementary Table S3** Logistic regression models with exposure of highest oxygenation severity category achieved for failure to return to within 25% of baseline HRQL

|                              | Follow-up time point         |                              |                              |
|------------------------------|------------------------------|------------------------------|------------------------------|
|                              | 3 mo (n = 178)               | 6 mo (n = 154)               | 12 mo (n = 145)              |
| Oxygenation failure severity | Adjusted odds ratio (95% CI) | Adjusted odds ratio (95% CI) | Adjusted odds ratio (95% CI) |
| None                         | Ref                          | Ref                          | Ref                          |
| Mild                         | 0.23 [0.03, 1.98]            | 1.23 [0.20, 7.60]            | 0.43 [0.08, 2.33]            |
| Moderate                     | 1.60 [0.50, 5.19]            | 1.12 [0.19, 6.67]            | 0.36 [0.07, 1.87]            |
| Severe                       | 1.84 [0.65, 5.23]            | 3.31 [0.93, 11.84]           | 1.26 [0.40, 4.03]            |

Abbreviations: CI, confidence interval; HRQL, health-related quality of life.

Note: Models adjusted for patient age and nonpulmonary Pediatric Logistic Organ Dysfunction-2 (PELOD-2) score. This analysis stratified the 291 survivors with respiratory failure by the highest severity category achieved. Note that the cohorts presented here are different than in the primary analysis: 33% (95/291) did not meet criteria for mild oxygenation defect, 21% (60/291) had mild oxygenation defect, 21% (62/291) had moderate, and 25% (74/291) had severe oxygenation defect.
